# Supplementary material for: Hyperpolarised [2-13C]-pyruvate by 13C SABRE in an acetone/water mixture
Source: Royal Society of Chemistry journal article supplement (doi:10.1039/d4an01005a), 2024-01-01
Supplement: d4an01005a1.pdf [file d4an01005a1.pdf]

## Supplementary Information: Hyperpolarised [2-<sup>13</sup>C]-pyruvate by SABRE in an acetone/water mixture.

Oksana A. Bondar,<sup>1</sup> Gamal A. I. Moustafa,<sup>2</sup> and Thomas B. R. Robertson<sup>1,\*</sup>

<sup>1</sup>*School of Chemistry, Highfield Campus, Southampton, SO17 1BJ United Kingdom.*

<sup>2</sup>*ATDBio (now part of Biotage), Highfield Campus, Southampton, SO17 1BJ United Kingdom*

### I. TOXICITY

The oral LD50 of acetone varies depending on the animal, and is 5,250 mg/kg in mice pretreated with olive oil, 5800 mg/kg in rats, 3000 mg/kg in mice, and 5340 mg/kg in rabbits.<sup>1</sup>

A potentially lethal dose of methanol is 30 to 240 mL, or 1 gram per kilogram. Ingesting as little as 30 mL of methanol can cause permanent visual damage.<sup>2</sup>

Regarding D<sub>2</sub>O used at current study, only higher concentrations (usually > 20% of body weight) can be toxic to animals and animal cells. Also D<sub>2</sub>O is used here only on purpose of NMR study, but other than that at in-vivo application normal H<sub>2</sub>O can be used.

### II. BUBBLING SYSTEM AND EXPERIMENTAL SETUP

The home-made bubbling system was used to purge NMR samples with parahydrogen gas. The schematics of the setup are shown in Fig. S1.

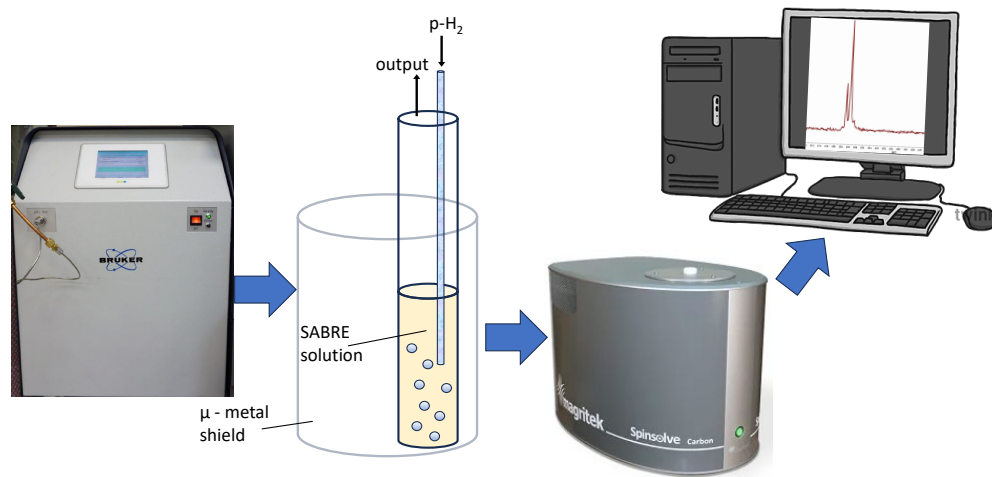

FIG. S1. Experimental details of the system for SABRE-polarized NMR.

### III. PARA-HYDROGEN ENRICHMENT.

The enrichment in parahydrogen is the first fundamental step to observe PHIP and the hyperpolarization level is closely related to the enrichment in the para isomer. In our experiment we use a para-hydrogen generator (BPHG Bruker Para-Hydrogen Generator) that operates at 36K and the percentage of para-hydrogen is, nominally, 92%.

\* t.b.r.robertson@soton.ac.uk

In order to obtain information about possible depleting of para-enrichment, we have measured the  $p\text{-H}_2$  percentage immediately after filling the NMR tube with parahydrogen and at increasing time delays, in order to get measurement of the decay rate of  $p\text{-H}_2$  in the NMR tubes.

Since  $p\text{-H}_2$  is NMR silent, the signal of the ortho- isomer is observed. In the Fig. S2 are reported the signals of hydrogen (normal- $\text{H}_2$  and para-enriched) after filling 5mm NMR tube tubes equipped with PTFE gas valves with the hydrogen mixtures, at the same pressure.

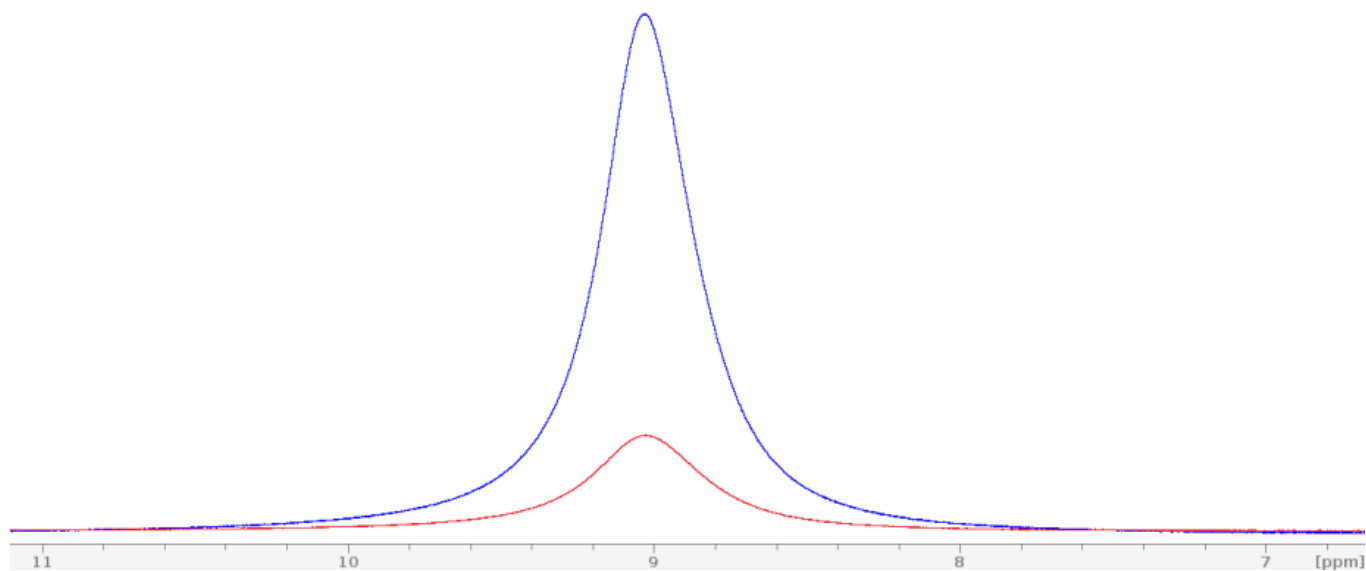

FIG. S2.  $o\text{-H}_2$  signals from a sample of 92%  $p\text{-H}_2$  enriched (blue line), from normal- $\text{H}_2$  (red line). In all the experiments the gas pressure was  $5000 \pm 50\text{mbar}$ , the signal has been precisely normalized to the gas pressure.

IV. SABRE OF  $[1-^{13}\text{C}]$ PYRUVATE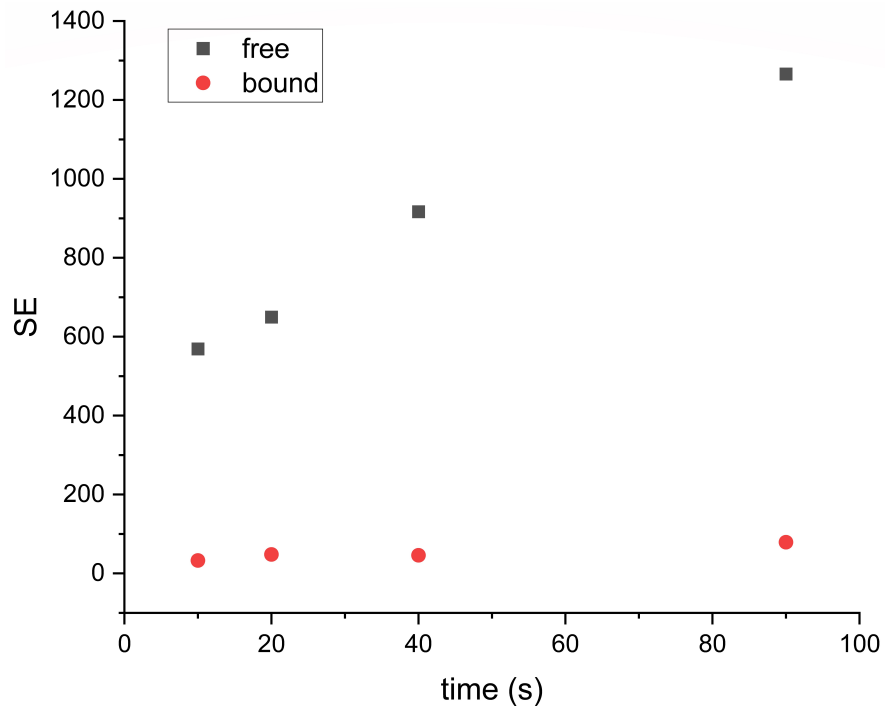FIG. S3. SE dependence from the bubbling time for hyperpolarized  $[1-^{13}\text{C}]$ pyruvate staying at the benchtop.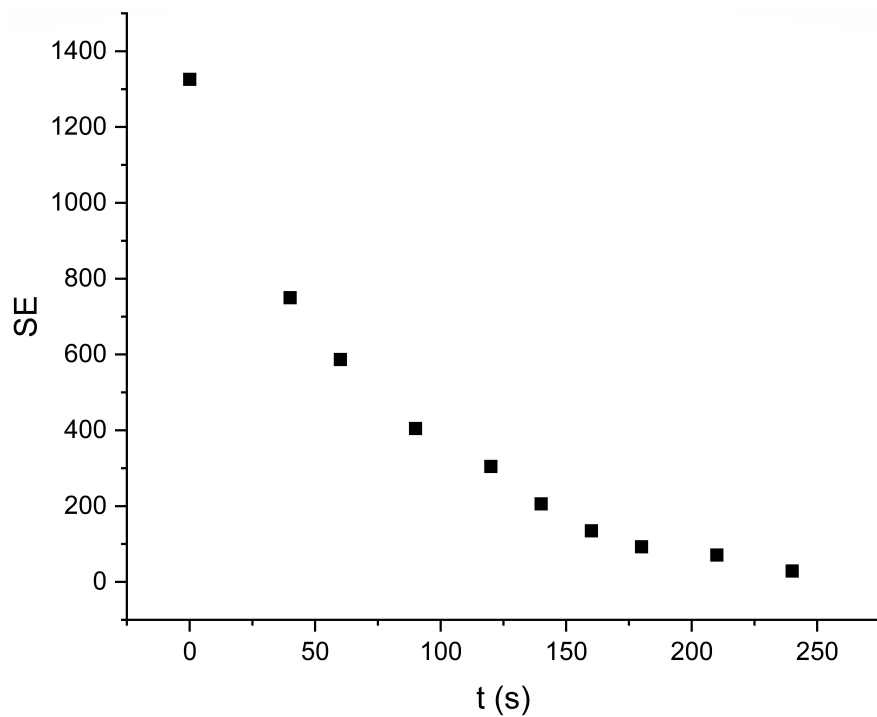FIG. S4.  $T_1$  decay for hyperpolarized  $[1-^{13}\text{C}]$ pyruvate measured experimentally.

## V. SABRE OF [2-<sup>13</sup>C]PYRUVATE

TABLE S1. Summary of results from Fig.2 SE dependence for free and bound (Sample I) from bubbling time

| Bubbling time | SE(free [2- <sup>13</sup> C]pyruvate) | SE(bound [2- <sup>13</sup> C]pyruvate) |
|---------------|---------------------------------------|----------------------------------------|
| 5             | 1133                                  | 119                                    |
| 10            | 1098 ± 174                            | 123 ± 37                               |
| 20            | 2148 ± 145                            | 288 ± 61                               |
| 40            | 2662 ± 142                            | 386 ± 53                               |
| 60            | 1937 ± 644                            | 330 ± 176                              |
| 90            | 1532 ± 140                            | 187 ± 64                               |
| 120           | 2405                                  | 357                                    |
| 180           | 1446                                  | 224                                    |

TABLE S2. Summary of all samples used to study the effect of catalyst concentration

| Number | [pyruvate]/[catalyst] | [DMSO], mM | V(D <sub>2</sub> O), μl | V(acetone-d <sub>6</sub> ), μl | SE       |
|--------|-----------------------|------------|-------------------------|--------------------------------|----------|
| 1      | 9                     | 23         | 200                     | 400                            | 733 ± 20 |
| 2      | 13                    | 23         | 200                     | 400                            | 515      |
| 3      | 18                    | 23         | 200                     | 400                            | 467      |
| 4      | 36                    | 23         | 200                     | 400                            | 392      |
| 5      | 64                    | 23         | 200                     | 400                            | 283      |
| 6      | 75                    | 23         | 100                     | 200                            | 74       |
| 7      | 83                    | 8          | 350                     | 100                            | 56       |
| 8      | 165                   | 8          | 100                     | 200                            | 51 ± 5   |
| 9      | 180                   | 23         | 200                     | 400                            | 128      |
| 10     | 211                   | 4          | 400                     | 200                            | 33 ± 2   |
| 11     | 246                   | 23         | 200                     | 400                            | 42 ± 7   |

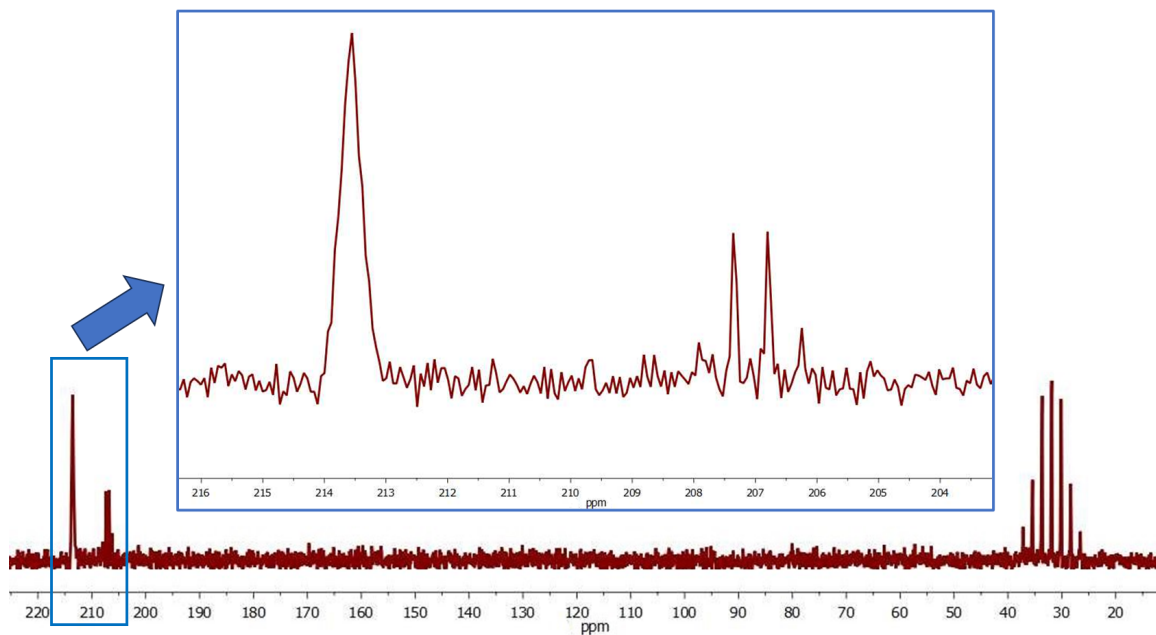

FIG. S5. <sup>13</sup>C spectrum of [2-<sup>13</sup>C]pyruvate in 200 μL D<sub>2</sub>O and 400 μL acetone-d<sub>6</sub> without catalyst with acetone signal at around 214 ppm that has been used as external standard to identify free and bounded pyruvate



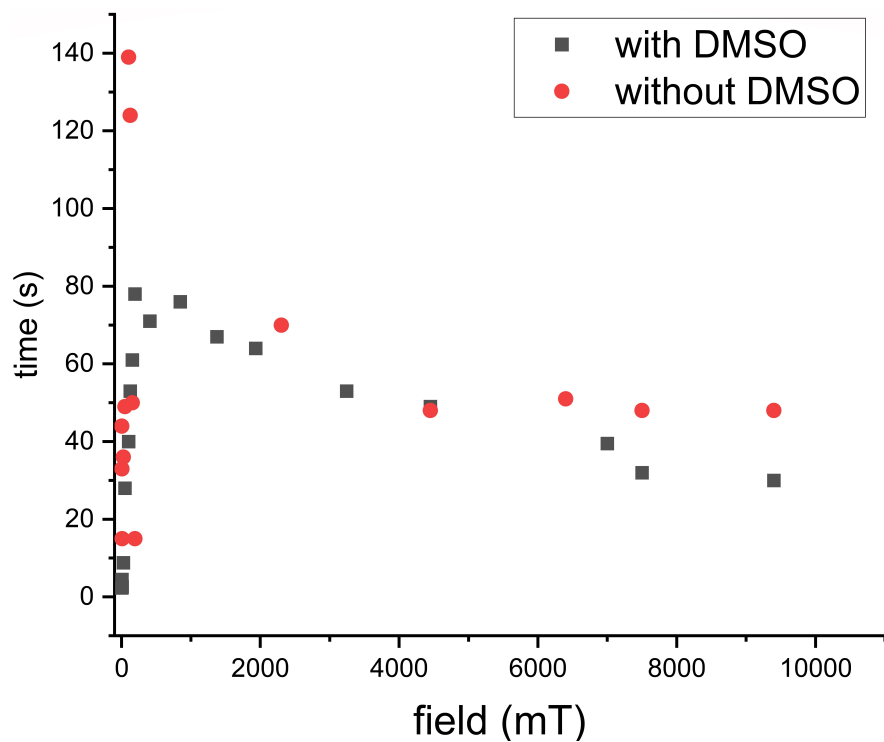

FIG. S6. Comparison of  $^{13}\text{C}$   $T_1$  measurements in different fields using shuttle system for (Sample **III**) and (Sample **IV**)

TABLE S3. Summary of  $T_1$  measurements for Fig.S6

| Field, mT | t,s with DMSO | t,s without DMSO |
|-----------|---------------|------------------|
| 4         | 2.3           | 44               |
| 6         | 4.5           | 33               |
| 9.8       | 2.6           | 15               |
| 26        | 8.8           | 36               |
| 50        | 28            | 49               |
| 103       | 40            | 139              |
| 126       | 53            | 124              |
| 156       | 61            | 50               |
| 194       | 78            | 15               |
| 409       | 71            |                  |
| 845       | 76            |                  |
| 1375      | 67            |                  |
| 1934      | 64            |                  |
| 2303      |               | 70               |
| 3243      | 53            |                  |
| 4450      | 49            | 48               |
| 6400      |               | 51               |
| 7000      | 39.5          |                  |
| 7500      | 32            | 48               |
| 9400      | 30            | 48               |

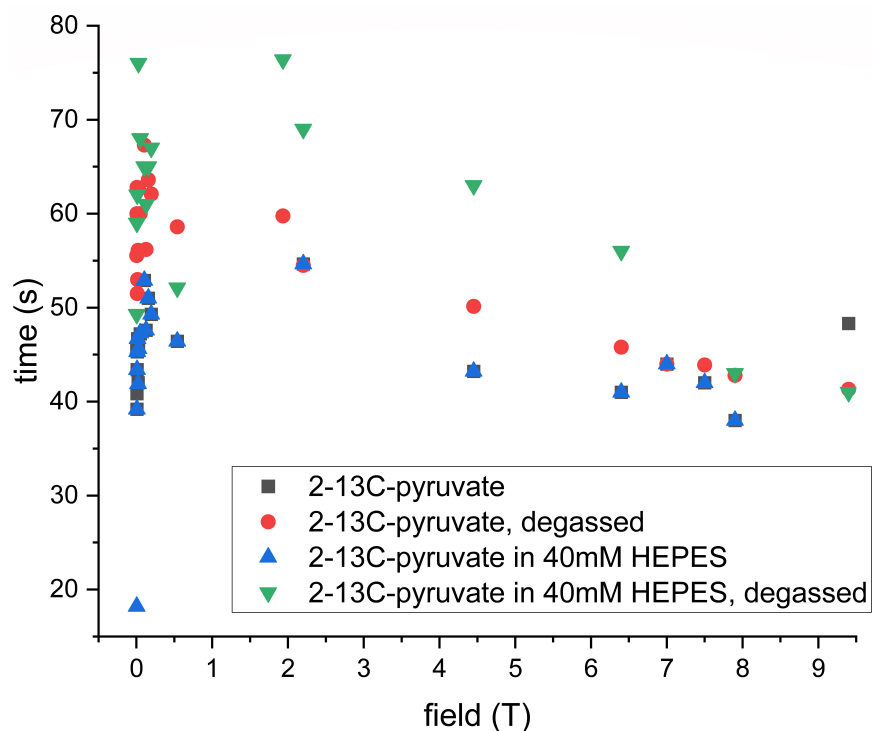

FIG. S7. Comparison of  $^{13}\text{C}$   $T_1$  measurements have been done in different fields using shuttle system<sup>3</sup> for  $[2-^{13}\text{C}]$ pyruvate in aqueous (pH = 6.83 ) and HEPES (pH = 6.23) solutions

TABLE S4. Summary of  $T_1$  measurements for Fig.S7

| Field, mT | t in $\text{H}_2\text{O}+\text{D}_2\text{O}$ t,s | t in $\text{H}_2\text{O}+\text{D}_2\text{O}$ , degassed,s | t in HEPES,s | t in HEPES, degassed,s |
|-----------|--------------------------------------------------|-----------------------------------------------------------|--------------|------------------------|
| 4         | 45.6                                             | 55.55                                                     | 18.2         | 49.3                   |
| height 6  | 39.2                                             | 60                                                        | 39.2         | 59                     |
| 8         | 43.4                                             | 62.8                                                      | 43.4         |                        |
| 9.8       | 45.3                                             | 51.5                                                      | 45.3         | 62                     |
| 14.5      | 46.7                                             | 53                                                        | 46.7         |                        |
| 26        | 45.65                                            | 62.63                                                     | 45.65        | 76                     |
| 50        | 47.21                                            | 60                                                        | 47.31        | 68                     |
| 103       | 52.9                                             | 67.3                                                      | 52.9         | 65                     |
| 126       | 47.6                                             | 56.2                                                      | 47.6         | 61                     |
| 156       | 51                                               | 63.6                                                      | 51           | 65                     |
| 194       | 49.3                                             | 62.1                                                      | 49.3         | 67                     |
| 1934      |                                                  | 59.77                                                     |              | 76.4                   |
| 2203      | 54.65                                            | 54.5                                                      | 54.65        | 69                     |
| 4450      | 43.22                                            | 50.138                                                    | 43.22        | 63                     |
| 6400      | 41                                               | 45.8                                                      | 41           | 56                     |
| 7000      | 44                                               | 44                                                        | 44           |                        |
| 7500      | 42                                               | 43.9                                                      | 42           |                        |
| 7900      | 38                                               | 42.8                                                      | 38           | 43                     |
| 9400      | 48.32                                            | 41.3                                                      |              | 41                     |

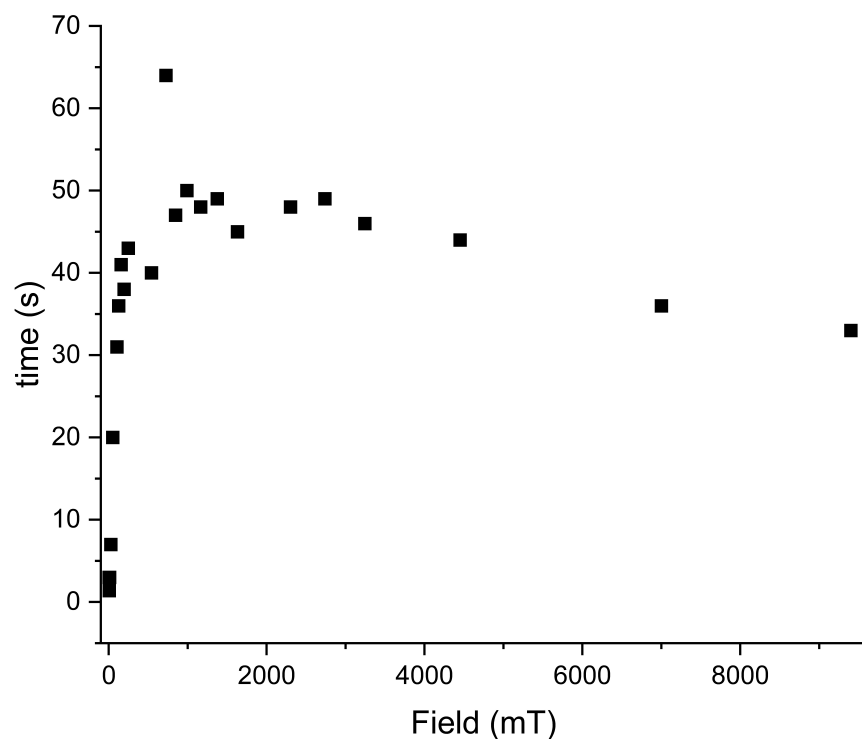

FIG. S8.  $^{13}\text{C}$   $T_1$  measurements for (Sample **VI**) in different fields with final total volume of solution is  $600\mu\text{l}$

TABLE S5. Summary of  $T_1$  measurements for Fig.S8

| Field, mT | t,s |
|-----------|-----|
| 4         | 3   |
| 6         | 1.4 |
| 9.8       | 3   |
| 26        | 7   |
| 50        | 20  |
| 103       | 31  |
| 126       | 36  |
| 156       | 41  |
| 194       | 38  |
| 246       | 43  |
| 540       | 40  |
| 724       | 64  |
| 845       | 47  |
| 990       | 50  |
| 1165      | 48  |
| 1375      | 49  |
| 1630      | 45  |
| 2303      | 70  |
| 3243      | 48  |
| 2737      | 49  |
| 3243      | 46  |
| 4450      | 44  |
| 7000      | 36  |
| 9400      | 33  |

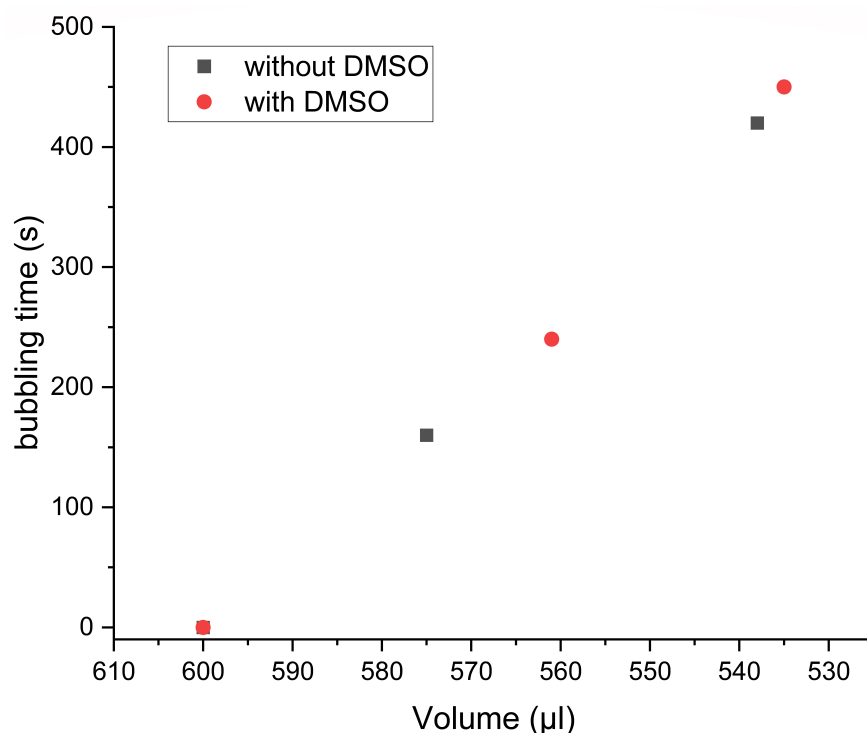

FIG. S9. Volume change over time of p-H<sub>2</sub> bubbling, volume of solution starts from 600 $\mu\text{l}$

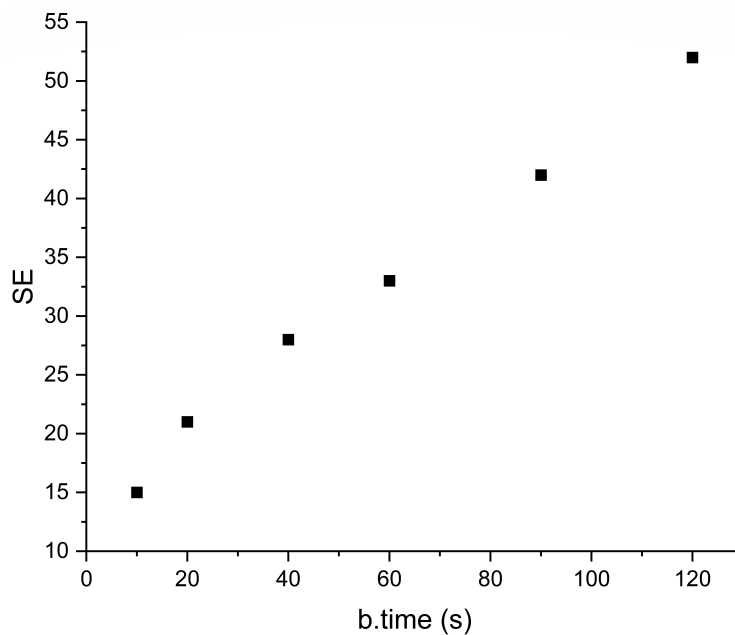

FIG. S10. SE dependence from parahydrogen time bubbling for (Sample **VIII**).

[1] [https://www.atsdr.cdc.gov/sites/peer\\_review/tox\\_profile\\_acetone.html](https://www.atsdr.cdc.gov/sites/peer_review/tox_profile_acetone.html).

[2] <https://www.ncbi.nlm.nih.gov/books/NBK482121>.

[3] C. Bengs, L. Dagys, G. A. Moustafa, J. W. Whipham, M. Sabba, A. S. Kiryutin, K. L. Ivanov, and M. H. Levitt, The Journal of Chemical Physics **155** (2021).
